# Supplementary material
Source: Springer Nature journal article supplement (https://www.springermedizin.de/resource/supplementary/13058_2013_3261_MOESM8_ESM.pdf/9703714)

Primary evidence

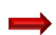

Multimodality inputs

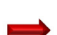

Computational models

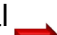

Personalised diagnostics and therapeutics

Clinical data

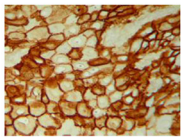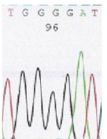

Gene mutation, overexpression  
ctDNA, CTC, Biomarkers

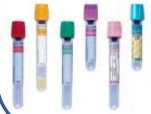

Experimental data

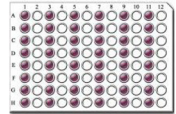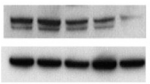

Cell cultures  
Oncoprotein expression  
Target validation  
In vivo studies

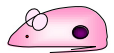

Omic profiles  
Bioinformatics

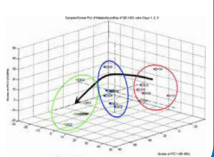

Pathway mapping

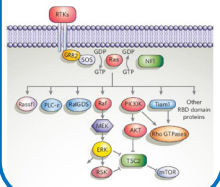

Patient stratification

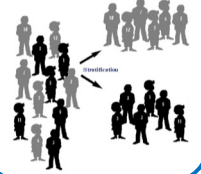

Prognostic information

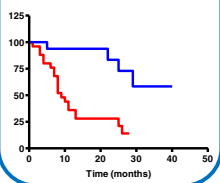

Targeted treatments

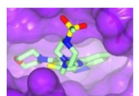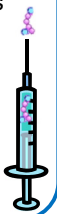

Therapeutic responses

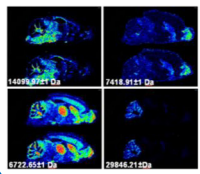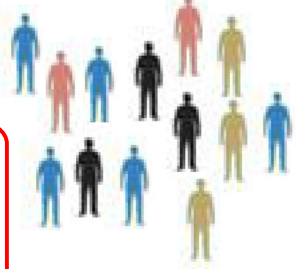

Patients selected for targeted therapies or no further treatment

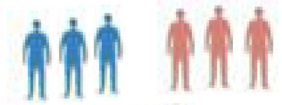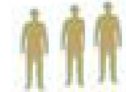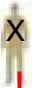

Treatment failure  
Drug resistance

Further research

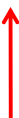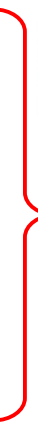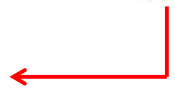

Supplement: MOESM8 [file 9703714]
